# Supplementary material for: Expansion of Microsatellites on Evolutionary Young Y Chromosome
Source: PubMed Central journal article supplement (PMC3547029; doi:10.1371/journal.pone.0045519), 2013-01-16

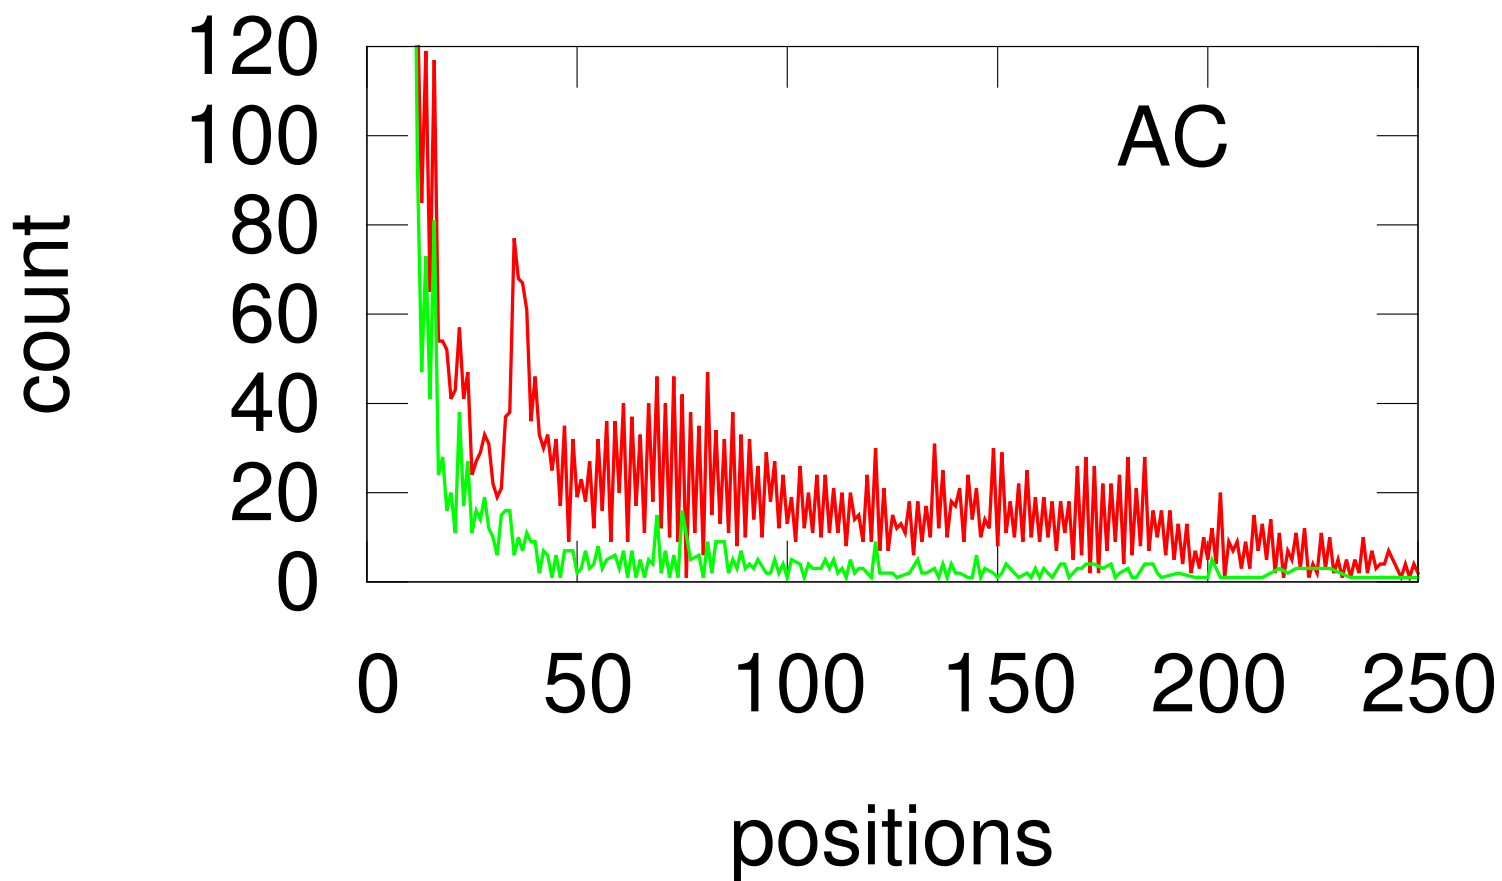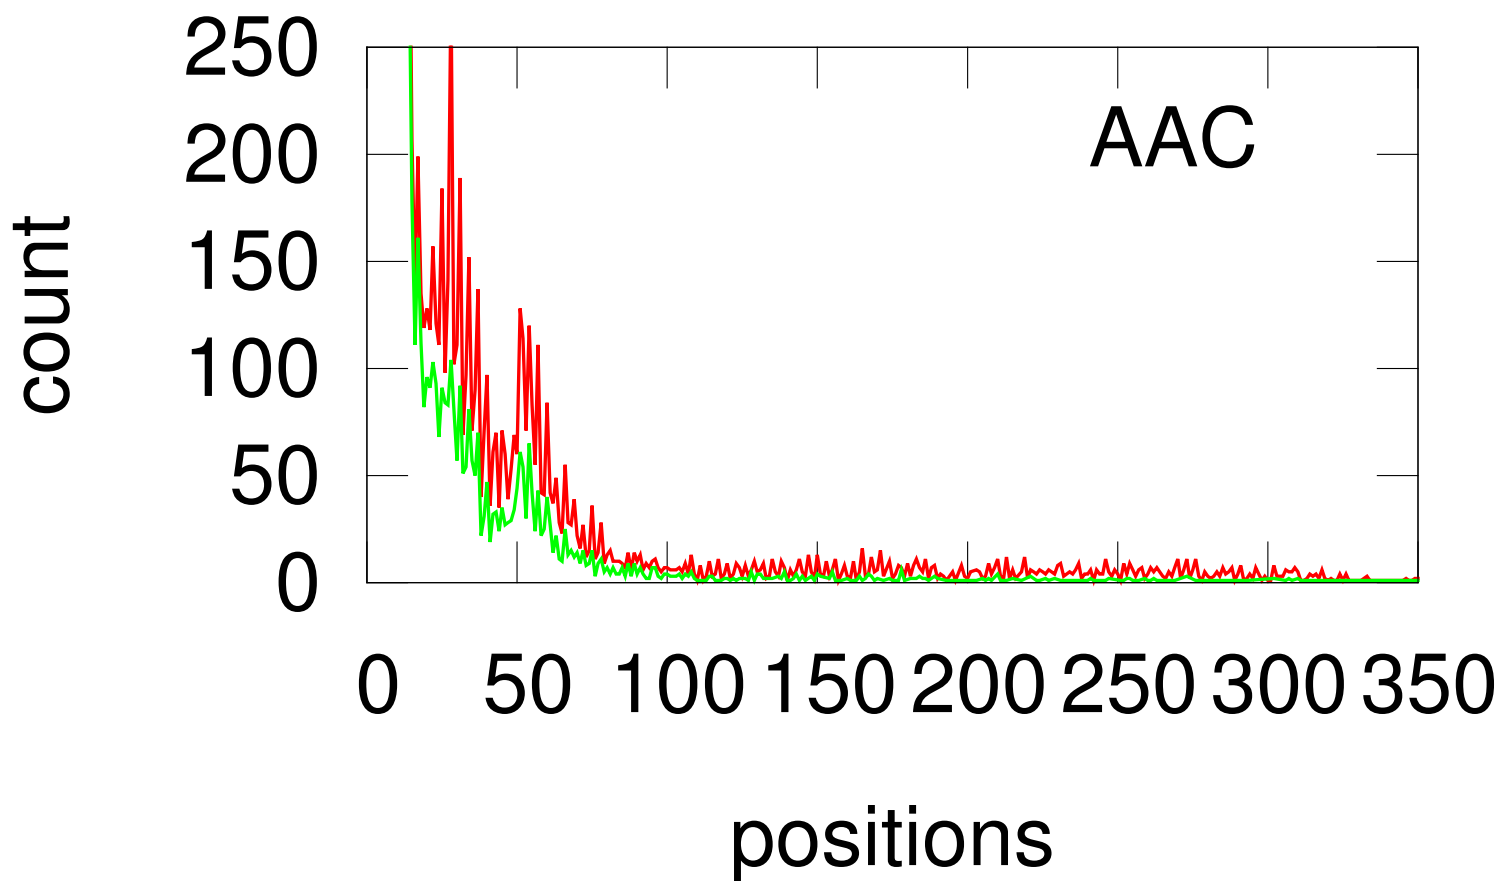

Supplement: pone.0045519.s005.pdf [file pone.0045519.s005.pdf]
